# Supplementary material for: Constructing a highly oriented layered MOF nanoarray from a layered double hydroxide for efficient and long-lasting alkaline water oxidation electrocatalysis
Source: Royal Society of Chemistry journal article supplement (doi:10.1039/c9ta00819e), 2019-01-01
Supplement: c9ta00819e1.pdf [file c9ta00819e1.pdf]

## Electronic Supplementary Information

### Experimental section

**Materials:** Ethanol ( $C_2H_5OH$ ) was bought from Chengdu Changlian Chemical Reagent Co., Ltd. (Chengdu, China). Potassium hydroxide (KOH) and sodium hydroxide (NaOH) were provided by Chengdu Kelong Chemical Reagent Factory (Chengdu, China). Hydrochloric acid (HCl), nickel nitrate hexahydrate ( $Ni(NO_3)_2 \cdot 6H_2O$ ), iron nitrate nonahydrate ( $Fe(NO_3)_3 \cdot 9H_2O$ ), ammonium fluoride ( $NH_4F$ ), urea ( $CO(NH_2)_2$ ), N,N-Dimethylformamide (DMF) and *p*-benzenedicarboxylic acid ( $C_8H_4O_4$ ) were purchased from Chengdu KeLong Chemical Co. Ltd. (Chengdu, China).  $RuCl_3 \cdot 3H_2O$ , and a Nafion (5 wt%) solution were obtained from Sigma–Aldrich Chemical Reagent Co., Ltd. (Shanghai, China). Nickel foam (NF) was purchased from Shenzhen Green and Creative Environmental Science and Technology Co., Ltd. (Shenzhen, China), and was pretreated in HCl, deionized water and ethanol several times to ensure the surface impurities removed. All above reagents and chemicals were used as received without further purification and the water used throughout all experiments was purified through a Millipore system.

**Preparation of NiFe–LDH/NF:** NiFe–LDH/NF was prepared according to previous work with minor modifications.<sup>1</sup> Firstly, 4.05 mmol  $Ni(NO_3)_2 \cdot 6H_2O$ , 0.45 mmol  $Fe(NO_3)_3 \cdot 9H_2O$ , 20 mmol  $CO(NH_2)_2$ , and 8 mmol  $NH_4F$  were added in 80 mL ultrapure water. After vigorous magnetically stirred for 10 min, as–formed pellucid solution was transferred to a 100 mL Teflon–lined stainless–steel autoclave with a piece of cleaned NF (4 cm × 6 cm). Secondly, the autoclave was sealed and maintained at 120 °C for 6 h in an electric oven and then cooled down naturally to room temperature. Thirdly, the NF covered with yellow green products was taken out and then washed with ultrapure water and ethanol several times before dring at 70 °C for 3 h in an electric oven. For comparison, NiFe<sub>x</sub>–LDH on NF with varied Ni/Fe atomic ratios of 1.00/0.00, 0.95/0.05, and 0.80/0.20 were also prepared by adjusting the  $Ni^{2+}/Fe^{3+}$  salt amount, ensuring the total mole number of  $Ni^{2+}$  added with  $Fe^{3+}$

ions is 4.5 mmol without any other variations, and the corresponding samples are denoted as Ni(OH)<sub>2</sub>/NF, NiFe<sub>0.05</sub>-LDH/NF, and NiFe<sub>0.20</sub>-LDH/NF, respectively.

**Preparation of Fe<sub>0.1</sub>-Ni-MOF/NF:** 3.5 mmol C<sub>8</sub>H<sub>4</sub>O<sub>4</sub>, 4.725 mmol Ni(NO<sub>3</sub>)<sub>2</sub>·6H<sub>2</sub>O, and 0.525 mmol Fe(NO<sub>3</sub>)<sub>3</sub>·9H<sub>2</sub>O were dissolved in 70 mL DMF under vigorous stirring to form a uniform solution. Then, 5 mL C<sub>2</sub>H<sub>5</sub>OH and 5 mL H<sub>2</sub>O were added in dropwise to the solution under constant stirring for 30 min. Then, the pellucid solution was transferred to a 100 mL Teflon-lined stainless-steel autoclave with a piece of NiFe-LDH/NF (4 cm × 6 cm). The autoclave was sealed and maintained at 120 °C for 12 h in an electric oven. After cooled down naturally to room temperature, the sample was taken out and washed with distilled water and ethanol several times, followed by drying at 70 °C for 3 h in vacuum. Ni-MOF on NF (Ni-MOF/NF) and Fe doped Ni-MOF on NF with varied Ni/Fe atomic ratios of 0.95/0.05 (Fe<sub>0.05</sub>-Ni-MOF/NF) and 0.80/0.20 (Fe<sub>0.2</sub>-Ni-MOF/NF) were prepared in a similar way.

**Preparation of RuO<sub>2</sub>:** RuO<sub>2</sub> was prepared according to previous report.<sup>2</sup> Specifically, 2.61 g of RuCl<sub>3</sub>·3H<sub>2</sub>O was dissolved in 100 mL ultrapure water under vigorous magnetic stirring for 10 min at 100 °C. Then 30 mL NaOH solution (1.0 M) was added into the above solution. After stirred for 45 min at 100 °C, the mixed solution was centrifuged for 10 min and filtered to collect the precipitates, which was washed with distilled water several times and the dried at 80 °C overnight. Finally, the precipitates were annealed at 350 °C for 1 h in air atmosphere to obtain crystalline RuO<sub>2</sub>. As-prepared RuO<sub>2</sub> powder (0.01 g) was dispersed into a solution of Nafion, ethanol and ultrapure water with a volume ratio of 10/250/250 *via* sonication, and then deposited onto NF with a mass loading of 3.2 mg cm<sup>-2</sup>.

**Characterizations:** X-ray diffraction (XRD) measurements were operated on a LabX XRD-6100 X-ray diffractometer with Cu K $\alpha$  radiation (40 kV, 35 mA) at a wavelength 1.54 Å (SHIMADZU, Japan) from 5° to 80°. Fourier transform infrared (FT-IR) transmission spectrum was collected on a Nicolet-6700 spectrometer using the potassium bromide pellet method. Raman spectrum was recorded on a LABRAM HR micro-Raman spectroscope with an excitation wavelength of 532 nm. Scanning electron microscope (SEM) images were recorded on a XL30 ESEM FEG scanning

electron microscope with an accelerating voltage of 20 kV. Cross-section SEM analysis was conducted on a JSM-7500F scanning electron microscope with an accelerating voltage of 20 kV. Transmission electron microscopy (TEM) images were collected on a HITACHI H-8100 electron microscopy (Hitachi, Tokyo, Japan) with an accelerating voltage of 200 kV. X-ray photoelectron spectroscopy (XPS) measurements were made on an AXIS Ultra DLD X-ray photoelectron spectrometer using Mg as the excitation source.

**Electrochemical measurements:** Electrochemical measurements were performed on a RST electrochemical workstation (Zhengzhou Shiruisi Technology Co., Ltd.) respectively using a Fe<sub>0.1</sub>-Ni-MOF/NF (0.5 × 0.5 cm) as the working electrode, a platinum plate (1.5 × 1.5 cm) as the counter electrode and an Hg/HgO as the reference electrode in a standard three-electrode system. All potentials reported in this work were calibrated to RHE unless especially stated according to the following equation:  $E \text{ (RHE)} = E \text{ (Hg/HgO)} + (0.098 + 0.0592 \text{ pH}) \text{ V}$ . All electrochemical measurements were carried out at room temperature (298.15 K) *via* the adjustment of air condition and heating support, ensuring the variation of diffusion coefficient within 1%.

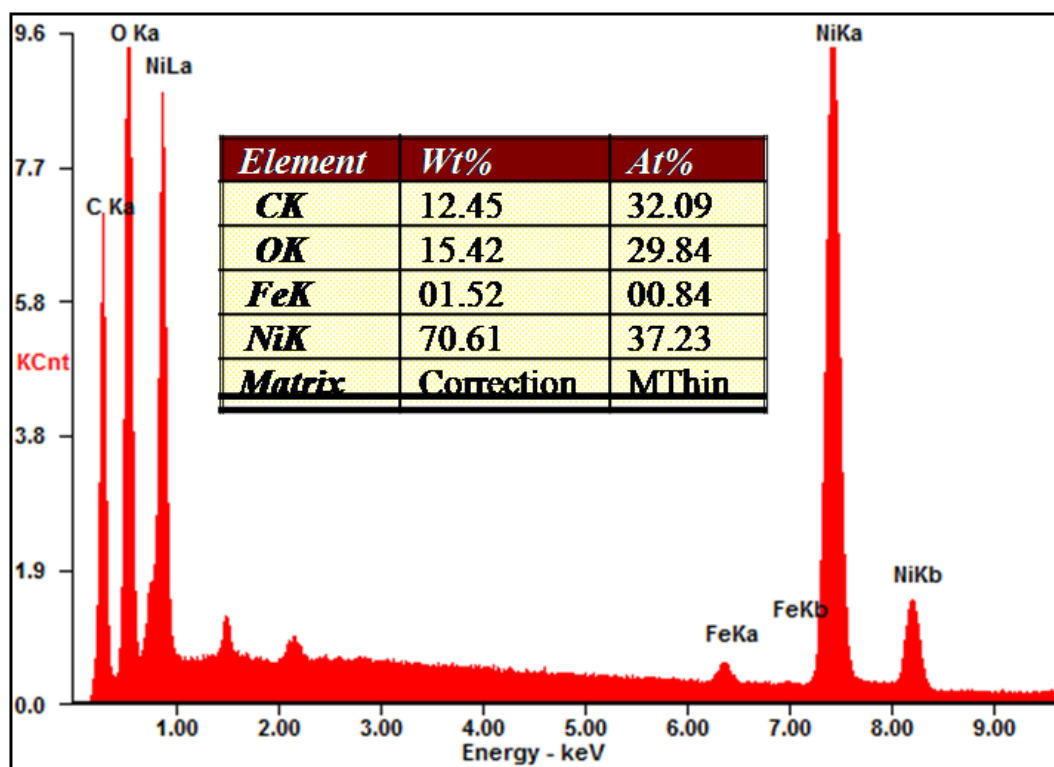

Fig. S1. EDX spectrum for Fe<sub>0.1</sub>-Ni-MOF/NF.

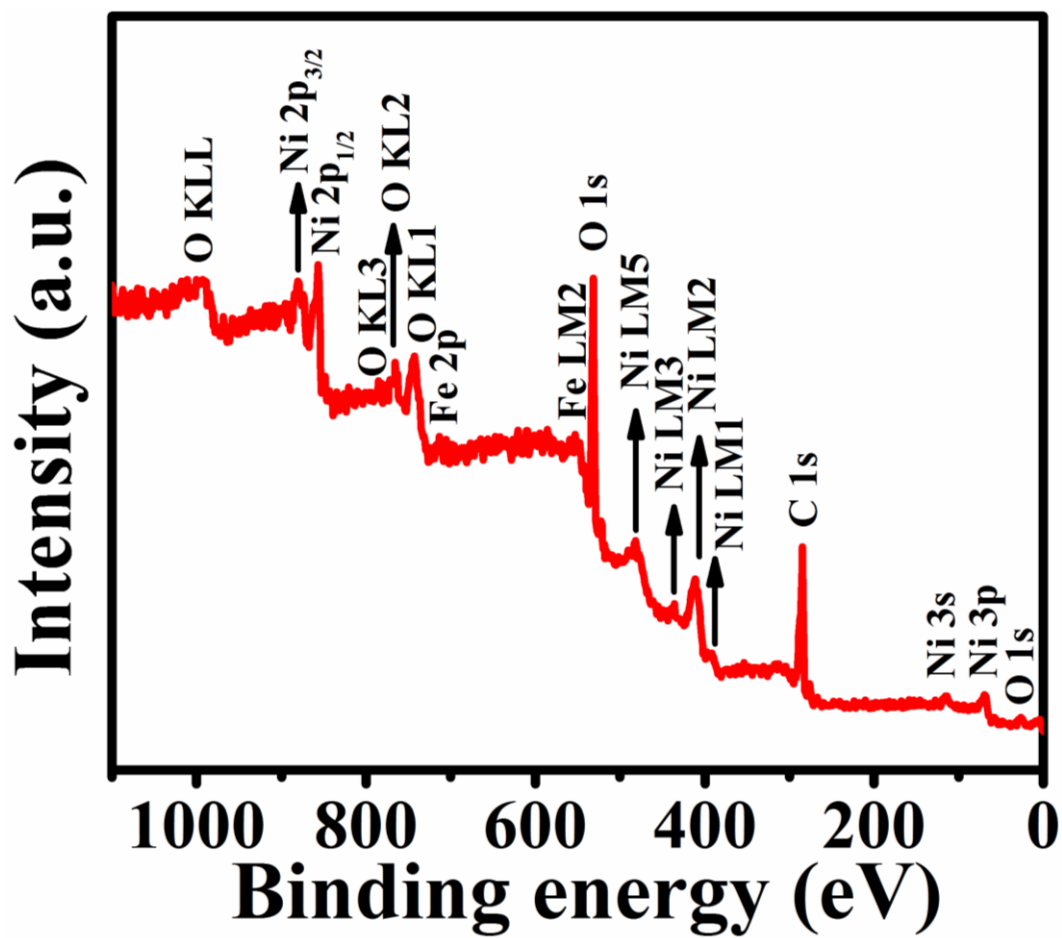

Fig. S2. XPS survey spectrum for Fe<sub>0.1</sub>-Ni-MOF.

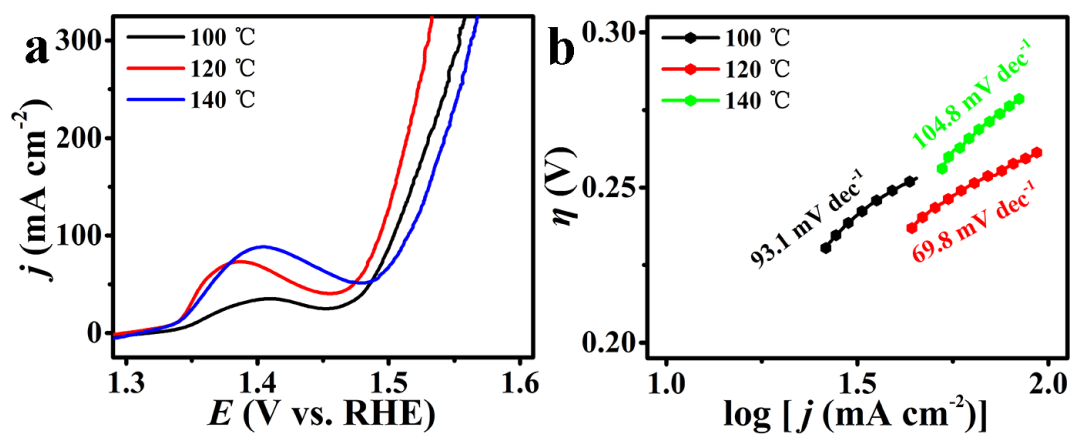

**Fig. S3.** (a) LSV curves of Fe<sub>0.1</sub>-Ni-MOF/NF samples prepared at 100, 120, and 140 °C for 12 h with a scan rate of 2 mV s<sup>-1</sup> for water oxidation. (b) Tafel plots for Fe<sub>0.1</sub>-Ni-MOF/NF samples prepared at 100, 120, and 140 °C for 12 h.

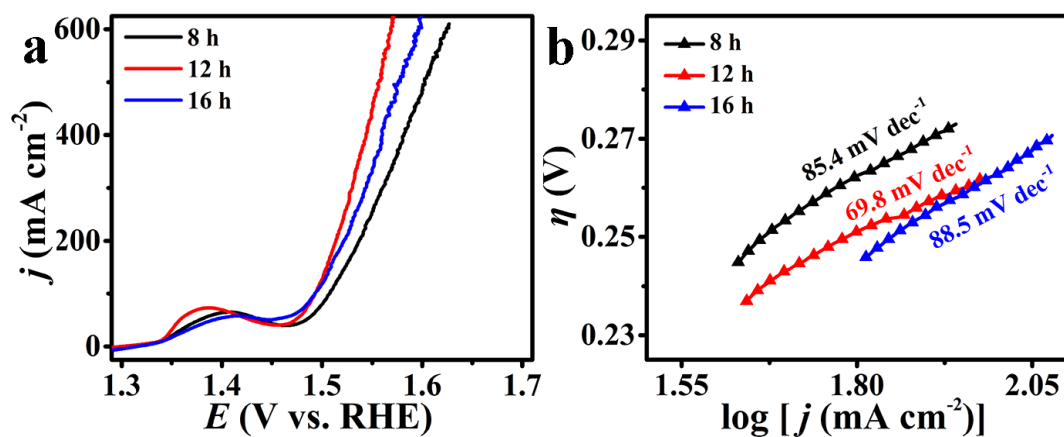

**Fig. S4.** (a) LSV curves of Fe<sub>0.1</sub>-Ni-MOF/NF samples prepared for 8, 12, and 16 h at 120 °C with a scan rate of 2 mV s<sup>-1</sup> for water oxidation. (b) Tafel plots for Fe<sub>0.1</sub>-Ni-MOF/NF samples prepared for 8, 12, and 16 h at 120 °C.

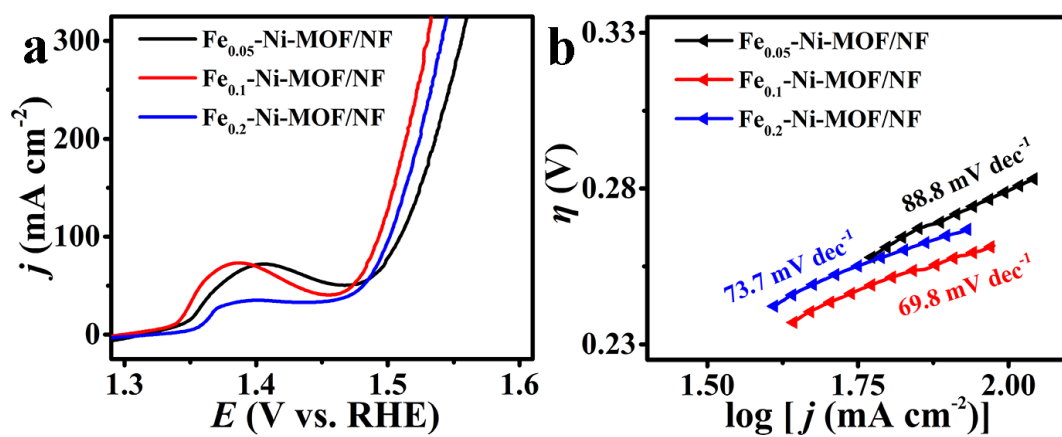

**Fig. S5.** (a) LSV curves of Fe<sub>0.05</sub>-Ni-MOF/NF, Fe<sub>0.1</sub>-Ni-MOF/NF, and Fe<sub>0.2</sub>-Ni-MOF/NF with a scan rate of 2 mV s<sup>-1</sup> for water oxidation. (b) Tafel plots for Fe<sub>0.05</sub>-Ni-MOF/NF, Fe<sub>0.1</sub>-Ni-MOF/NF, and Fe<sub>0.2</sub>-Ni-MOF/NF.



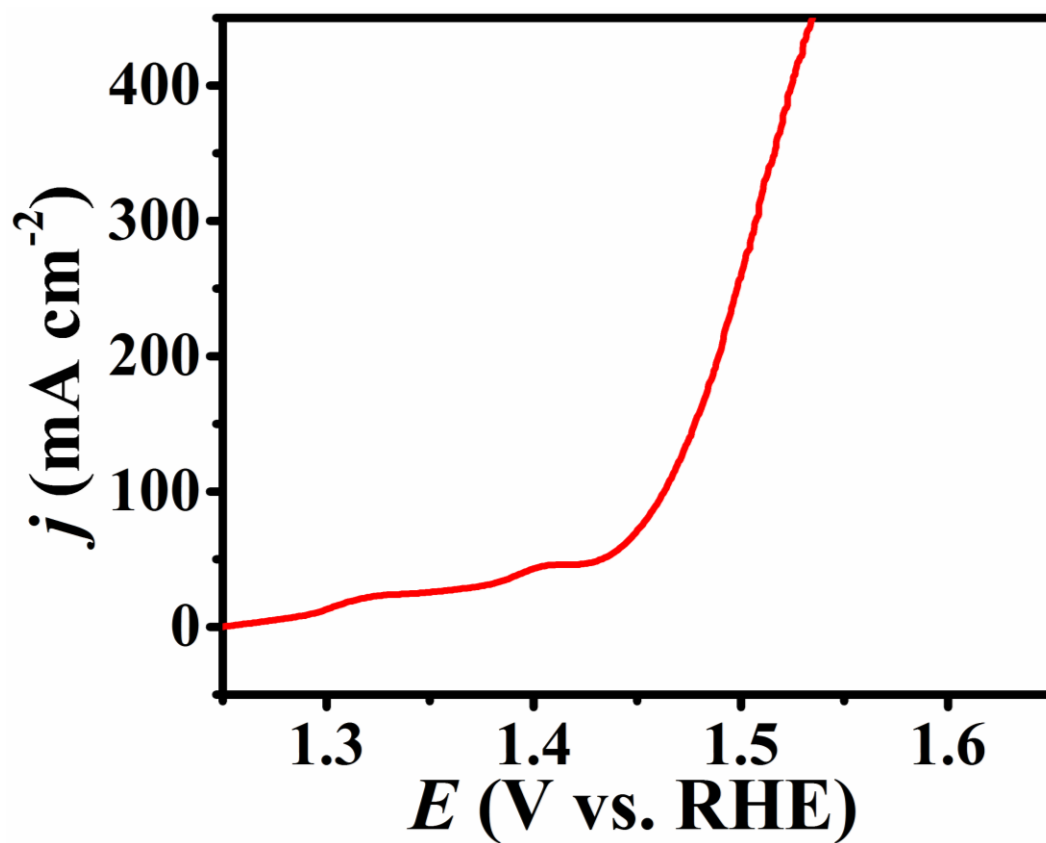

**Fig. S6.** LSV curve of Fe<sub>0.1</sub>-Ni-MOF/NF with a scan rate of 2 mV s<sup>-1</sup> for water oxidation in 30 wt% KOH.

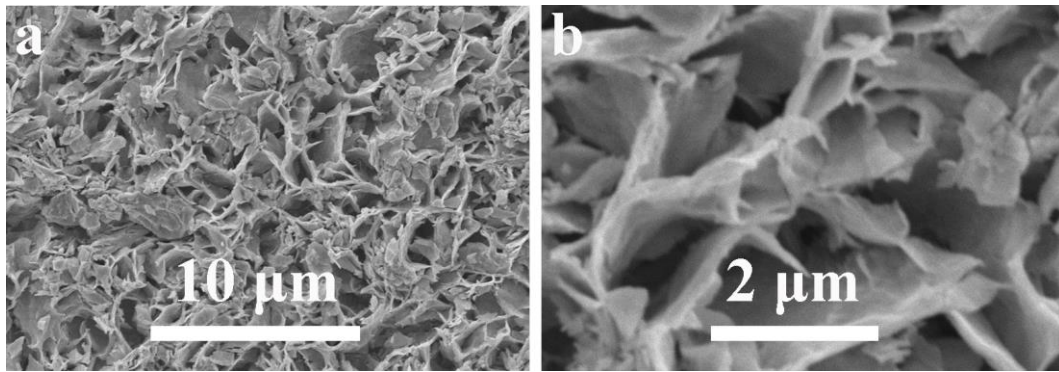

**Fig. S7.** (a) Low- and (b) high- magnification SEM images for  $\text{Fe}_{0.1}\text{-Ni-MOF/NF}$  after after durability test.

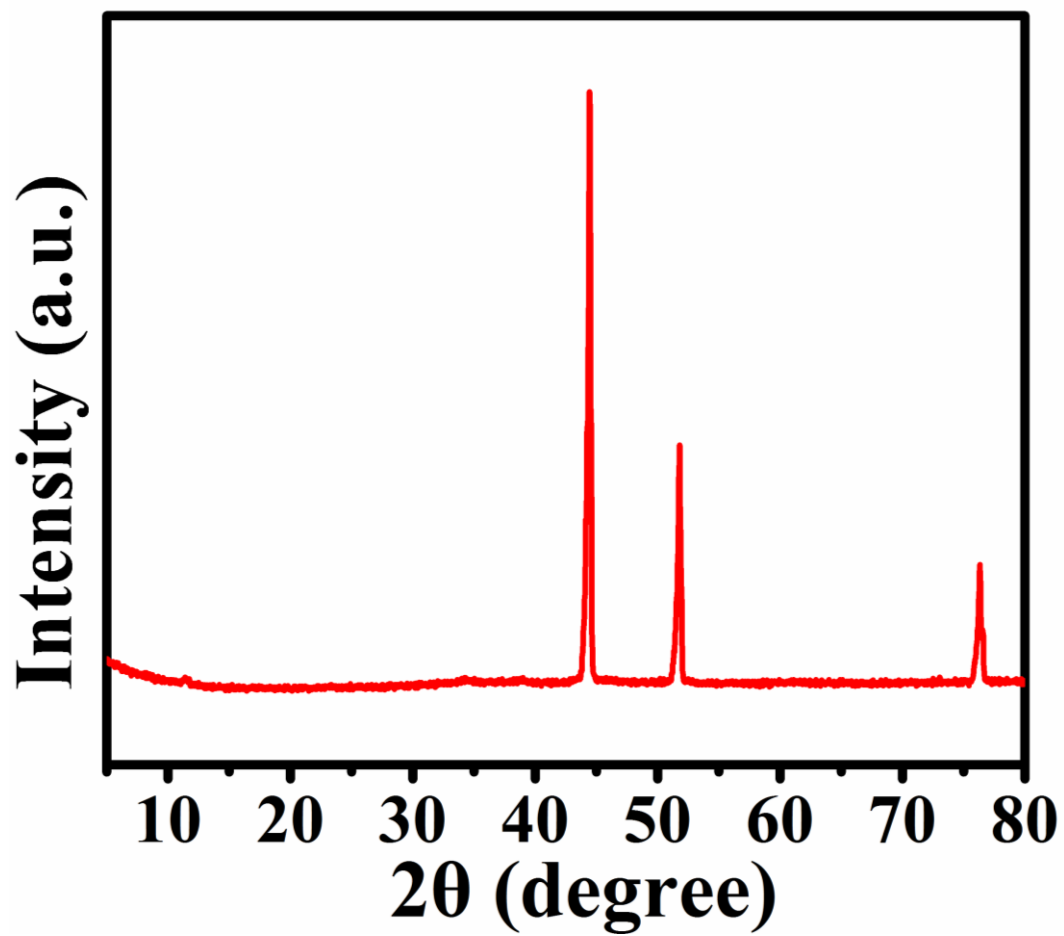

**Fig. S8.** XRD pattern for Fe<sub>0.1</sub>-Ni-MOF/NF after durability test.

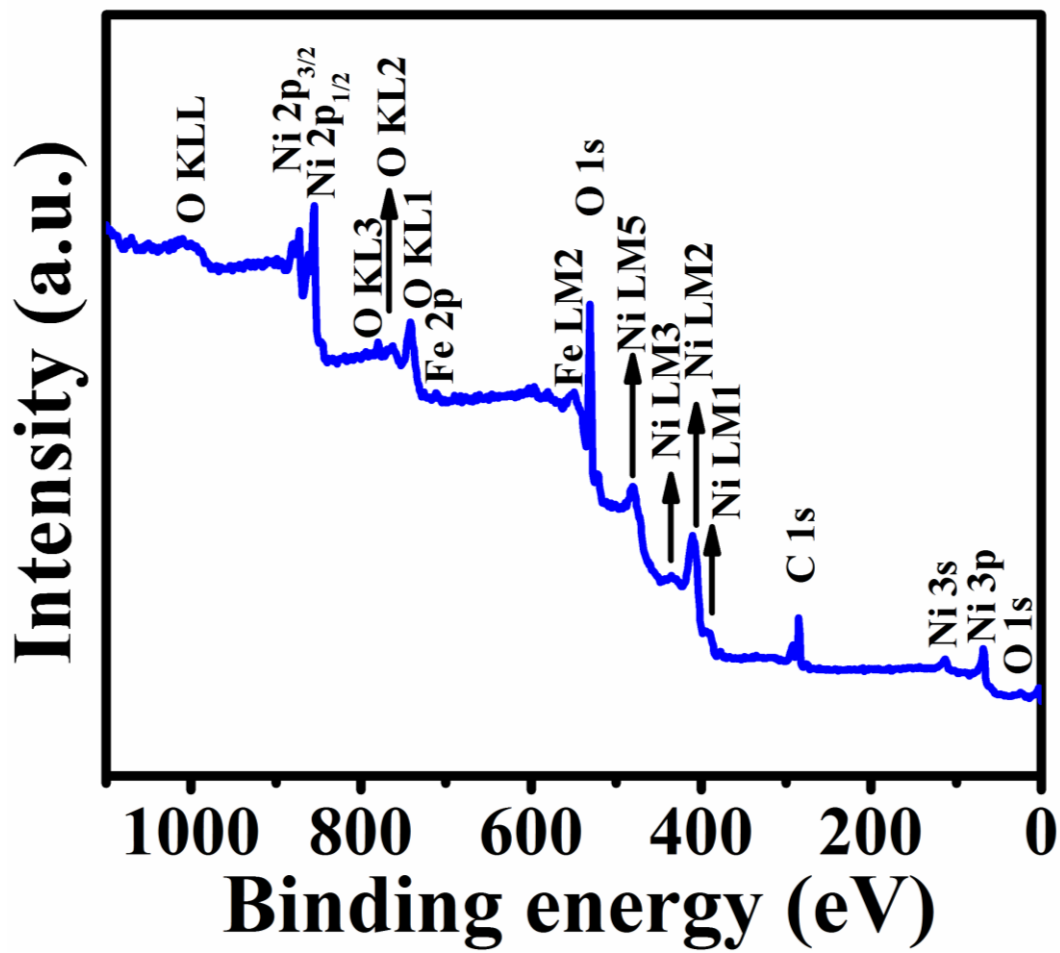

Fig. S9. XPS survey spectrum for Fe<sub>0.1</sub>-Ni-MOF after durability test.

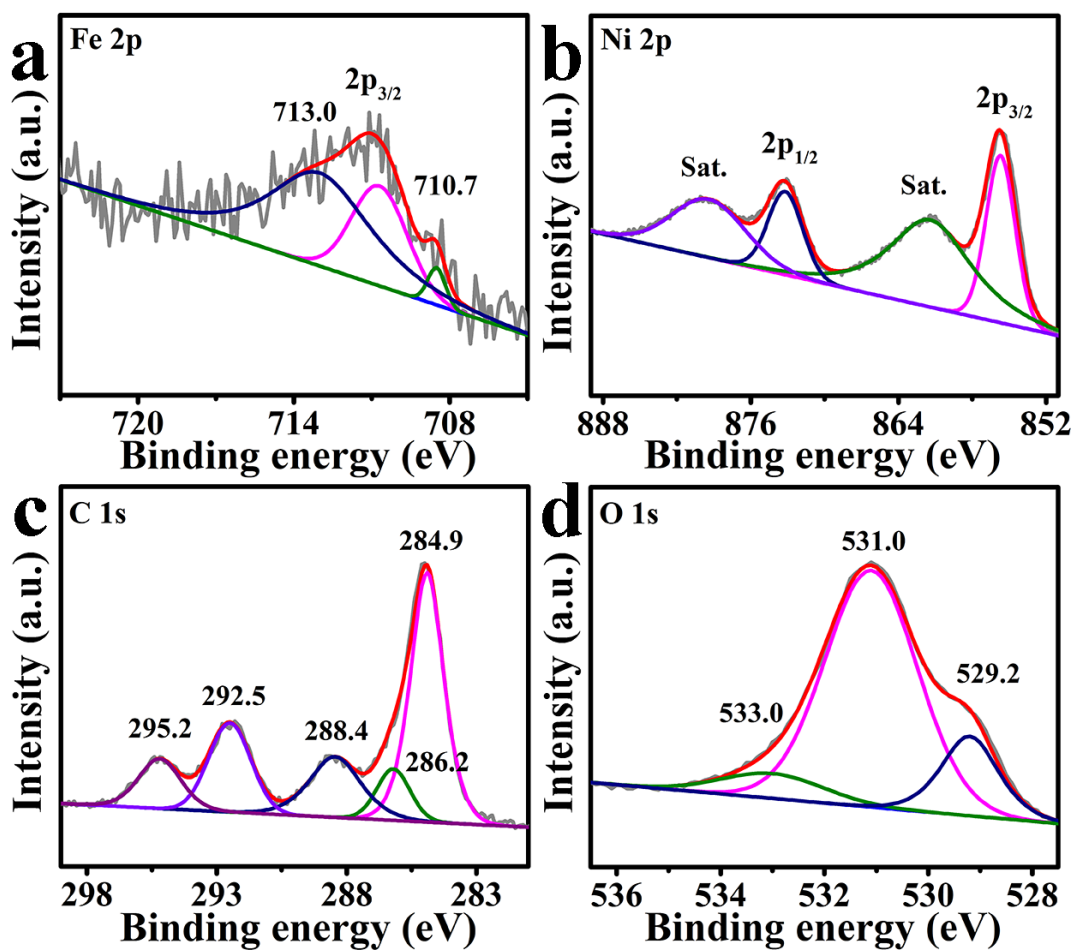

**Fig. S10.** XPS spectra for Fe<sub>0.1</sub>-Ni-MOF/NF in the (a) Fe 2p, (b) Ni 2p, (c) C 1s, and (d) O 1s regions after durability test.

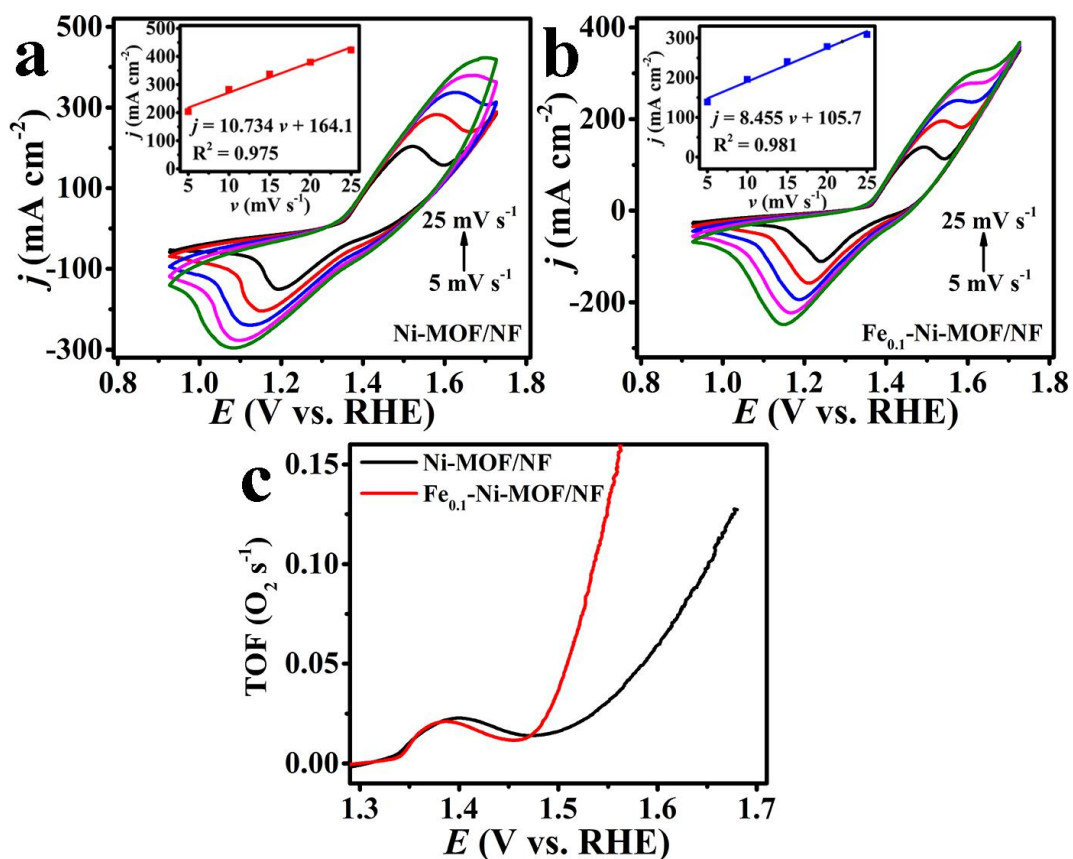

**Fig. S11.** CVs for (a) Ni-MOF/NF and (b) Fe<sub>0.1</sub>-Ni-MOF/NF in the faradic capacitance current range at scan rates from 5 to 25 mV s<sup>-1</sup> (inset: the corresponding plots of oxidation peak current densities versus the scan rates from CVs) in 1.0 M KOH. (c) Plots for TOFs for Ni-MOF/NF and Fe<sub>0.1</sub>-Ni-MOF/NF versus the overpotential.

**Table S1.** Comparison of water oxidation performance for Fe<sub>0.1</sub>-Ni-MOF/NF with other earth-abundant WOCs working under alkaline conditions.

| Catalyst                                                | $j$ (mA cm <sup>-2</sup> ) | $\eta$ (mV) | Electrolyte | Ref.      |
|---------------------------------------------------------|----------------------------|-------------|-------------|-----------|
| Fe <sub>0.1</sub> -Ni-MOF/NF                            | 50                         | 243         | 1.0 M KOH   | This work |
|                                                         | 100                        | 263         |             |           |
|                                                         | 200                        | 284         |             |           |
| Ni-MOF/NF                                               | 100                        | 298         |             |           |
|                                                         | 200                        | 347         |             |           |
| Ni-MOF/NF                                               | 100                        | 320         | 1.0 M KOH   | 3         |
| NiPc-MOF modified FTO                                   | 10                         | ≈390        | 1.0 M KOH   | 4         |
| Ni(OH) <sub>2</sub> -TCNQ/CF                            | 50                         | 322         | 1.0 M KOH   | 5         |
| benzoate-Ni(OH) <sub>2</sub> /NF                        | 60                         | 242         | 1.0 M KOH   | 6         |
| ultrathin NiFe-MOF film                                 | 150                        | ≈330        | 0.1 M KOH   | 7         |
| NiFe-MOF-74 rhombic crystals/NF                         | 100                        | ≈390        | 1.0 M KOH   | 8         |
| 2D Ni-MOF@Fe-MOF                                        | 10                         | 265         | 1.0 M KOH   | 9         |
| MIL-53(FeNi)/NF                                         | 50                         | 233         | 1.0 M KOH   | 10        |
| Fe-MOF/NF                                               | 100                        | 270         | 1.0 M KOH   | 11        |
| Fe(TCNQ) <sub>2</sub> /CF                               | 50                         | 353         | 1.0 M KOH   | 12        |
| Fe(TCNQ) <sub>2</sub> /Fe                               | 10                         | 340         | 1.0 M KOH   | 13        |
| NiCo-POM/Ni                                             | 10                         | 360         | 1.0 M KOH   | 14        |
| NiCo-UMOFNs                                             | 10                         | 250         | 1.0 M KOH   | 15        |
| CoCd-BNN                                                | 1                          | 353         | 0.1 M KOH   | 16        |
| UTSA-16                                                 | 10                         | 408         | 1.0 M KOH   | 17        |
| UTSA-16-derived Co <sub>3</sub> O <sub>4</sub>          |                            | 465         |             |           |
| Co-MOF/NF                                               | 50                         | 311         | 1.0 M KOH   | 18        |
| Co(TCNQ) <sub>2</sub> /Co                               | 15                         | 310         | 1.0 M KOH   | 19        |
| Co(OH) <sub>2</sub> -TCNQ/CF                            | 25                         | 276         | 1.0 M KOH   | 20        |
| MOF derived Co <sub>3</sub> O <sub>4</sub> NA/CF        | 15                         | 308         | 1.0 M KOH   | 21        |
| benzoate-Co(OH) <sub>2</sub> /NF                        | 50                         | 291         | 1.0 M KOH   | 22        |
| CuO-TCNQ/CF                                             | 25                         | 317         | 1.0 M KOH   | 23        |
| Cu-N-C NA/CF                                            | 20                         | 314         | 1.0 M KOH   | 24        |
| NiO@Ni-B <sub>i</sub> /CC                               | 10                         | 290         | 1.0 M KOH   | 25        |
| NiSe/NF                                                 | 20                         | 270         | 1.0 M KOH   | 26        |
| Fe <sub>0.1</sub> -NiS <sub>2</sub> NA/Ti               | 100                        | 231         | 1.0 M KOH   | 27        |
| Fe <sub>11.8%</sub> -Ni <sub>3</sub> S <sub>2</sub> /NF | 100                        | 253         | 1.0 M KOH   | 28        |
| Zn-Ni <sub>3</sub> S <sub>2</sub> /NF                   | 100                        | 330         | 1.0 M KOH   | 29        |
| NiFe-LDH/CNT                                            | 10                         | 247         | 1.0 M KOH   | 30        |
| NiFe-LDH@NiFe-B <sub>i</sub> /CC                        | 50                         | 294         | 1.0 M KOH   | 31        |
| Fe-NiSe/FeNi foam                                       | 100                        | 264         | 1.0 M KOH   | 32        |

|                                                           |      |      |            |    |
|-----------------------------------------------------------|------|------|------------|----|
| NiFe/NF                                                   | 20   | 264  | 1.0 M KOH  | 33 |
| De-LNiFeP/rGO                                             | 10   | 258  | 1.0 M KOH  | 34 |
| NiCo <sub>2</sub> S <sub>4</sub> @NiFe LDH/NF             | 60   | 201  | 1.0 M KOH  | 35 |
| Co <sub>0.13</sub> Ni <sub>0.87</sub> Se <sub>2</sub> /Ti | 100  | 320  | 1.0 M KOH  | 36 |
| Ni <sub>0.75</sub> V <sub>0.25</sub> -LDH                 | 57   | 350  | 1.0 M KOH  | 37 |
| Fe-NiCr <sub>2</sub> O <sub>4</sub> /NF                   | 20   | 228  | 1.0 M KOH  | 38 |
| NiOOH-NiCr <sub>2</sub> O <sub>4</sub> /NF                | 20   | 271  | 1.0 M KOH  | 39 |
| NiCo <sub>2</sub> S <sub>4</sub> NA/CC                    | 100  | 340  | 1.0 M KOH  | 40 |
| NiCoP NSAs/NF                                             | 50   | 308  | 1.0 M KOH  | 41 |
| Ni <sub>2.3%</sub> -CoS <sub>2</sub> /CC                  | 100  | 370  | 1.0 M KOH  | 42 |
| Ni-Co-S/CF                                                | 100  | 363  | 1.0 M KOH  | 43 |
| Co <sub>3</sub> O <sub>4</sub> -MTA                       | 150  | 360  | 1.0 M KOH  | 44 |
| CoTe <sub>2</sub> nanofleeces                             | 10   | 357  | 0.1 M KOH  | 45 |
| MnCo <sub>2</sub> S <sub>4</sub> NA/TM                    | 50   | 325  | 1.0 M KOH  | 46 |
| Al-CoP/NF                                                 | 50   | 280  | 1.0 M KOH  | 47 |
| Hollow Fe <sub>0.5</sub> V <sub>0.5</sub> spheres         | 10   | 390  | 1.0 M KOH  | 48 |
| (Co <sub>0.54</sub> Fe <sub>0.46</sub> ) <sub>2</sub> P   | 10   | 280  | 1.0 M KOH  | 49 |
| FeOOH/CeO <sub>2</sub> HLNTs-NF)                          | 31.3 | 250  | 1.0 M NaOH | 50 |
| Co-B@CoO                                                  | 10   | 290  | 1.0 M KOH  | 51 |
| Fe-CoP/Ti                                                 | 10   | 230  | 1.0 M KOH  | 52 |
| P-Co <sub>3</sub> O <sub>4</sub> /NF                      | 20   | 260  | 1.0 M KOH  | 53 |
| Co <sub>3</sub> O <sub>4</sub> /CoMoO <sub>4</sub> -50    | 10   | 318  | 0.1 M KOH  | 54 |
| FeB <sub>2</sub>                                          | 10   | 296  | 1.0 M KOH  | 55 |
| Mn@Co <sub>x</sub> Mn <sub>3-x</sub> O <sub>4</sub>       | 10   | 246  | 1.0 M KOH  | 56 |
| NF@NC-CoFe <sub>2</sub> O <sub>4</sub> /C NRAs            | 10   | 240  | 1.0 M KOH  | 57 |
| CuCo <sub>2</sub> S <sub>4</sub> /CF                      | 100  | 295  | 1.0 M KOH  | 58 |
| Co-Cu <sub>2</sub> S/CF                                   | 20   | 298  | 1.0 M KOH  | 59 |
|                                                           | 50   | 357  |            |    |
| Cu <sub>3</sub> P@NF                                      | 10   | ~320 | 1.0 M KOH  | 60 |



## References

- 1 X. Liu, X. Wang, X. Yuan, W. Dong and F. Huang, *J. Mater. Chem. A*, 2016, **4**, 167–172.
- 2 J. C. Cruz, V. Baglio, S. Siracusano, V. Antonucci, A. S. Aricò, R. Ornelas, L. Ortiz–Frade, G. Osorio–Monreal, S. M. Durón–Torres and L. Arriaga, *Int. J. Electrochem. Sci.*, 2011, **6**, 6607–6619.
- 3 Q. Liu, L. Xie, X. Shi, G. Du, A. M. Asiri, Y. Luo and X. Sun, *Inorg. Chem. Front.*, 2018, **5**, 1570–1574.
- 4 H. Jia, Y. Yao, J. Zhao, Y. Gao, Z. Luo and P. Du, *J. Mater. Chem. A*, 2018, **6**, 1188–1195.
- 5 X. Guo, R. Kong, X. Zhang, H. Du and F. Qu, *ACS Catal.*, 2018, **8**, 651–655.
- 6 M. Ma, R. Ge, X. Ji, X. Ren, Z. Liu, A.M. Asiri and X. Sun, *ACS Sustainable Chem. Eng.*, 2017, **5**, 9625–9629.
- 7 J. Duan, S. Chen and C. Zhao, *Nature Commun.*, 2017, **8**, 15341–15348.
- 8 J. Xing, K. Guo, Z. Zou, M. Cai, J. Du and C. Xu, *Chem. Commun.*, 2018, **54**, 7046–7049.
- 9 K. Rui, G. Zhao, Y. Chen, Y. Lin, Q. Zhou, J. Chen, J. Zhu, W. Sun, W. Huang and S. Dou, *Adv. Funct. Mater.*, 2018, **28**, 1801554.
- 10 F. Sun, G. Wang, Y. Ding, C. Wang, B. Yuan and Y. Lin, *Adv. Energy Mater.*, 2018, **8**, 1800584.
- 11 X. Zhang, Q. Liu, X. Shi, A. M. Asiri and X. Sun, *Inorg. Chem. Front.*, 2018, **5**, 1405–1408.
- 12 X. Guo, S. Zhu, R. Kong, X. Zhang and F. Qu, *ACS Sustainable Chem. Eng.*, 2018, **6**, 1545–1549.
- 13 M. Xie, X. Xiong, L. Yang, X. Shi, A.M. Asiri and X. Sun, *Chem. Commun.*, 2018, **54**, 2300–2303.
- 14 W. Luo, J. Hu, H. Diao, B. Schwarz, C. Streb and Y. Song, *Angew. Chem., Int. Ed.*, 2017, **56**, 4941–4944.
- 15 S. Zhao, Y. Wang, J. Dong, C.-T. He, H. Yin, P. An, K. Zhao, X. Zhang, C. Gao, L.

- Zhang, J. Lv, J. Wang, J. Zhang, A.M. Khattak, N.A. Khan, Z. Wei, J. Zhang, S. Liu, H. Zhao and Z. Tang, *Nat. Energy*, 2016, **1**, 16184.
- 16 K. Maity, K. Bhunia, D. Pradhan and K. Biradha, *ACS Appl. Mater. Interfaces*, 2017, **9**, 37548–37553.
- 17 J. Jiang, L. Huang, X. Liu and L. Ai, *ACS Appl. Mater. Interfaces*, 2017, **9**, 7193–7201.
- 18 X. Zhang, W. Sun, H. Du, R. Kong and F. Qu, *Inorg. Chem. Front.*, 2018, **5**, 344–347.
- 19 Y. Wei, X. Ren, H. Ma, X. Sun, Y. Zhang, X. Kuang, T. Yan, D. Wu and Q. Wei, *Chem. Eur. J.*, 2018, **24**, 2075–2079.
- 20 D. Wu, Y. Wei, X. Ren, X. Ji, Y. Liu, X. Guo, Z. Liu, A. M. Asiri, Q. Wei and X. Sun, *Adv. Mater.*, 2018, **30**, 1705366.
- 21 Y. Wei, X. Ren, H. Ma, X. Sun, Y. Zhang, X. Kuang, T. Yan, H. Ju, D. Wu and Q. Wei, *Chem. Commun.*, 2018, **54**, 1533–1536.
- 22 R. Ge, X. Ren, X. Ji, Z. Liu, G. Du, A. M. Asiri, X. Sun and L. Chen, *ChemSusChem*, 2017, **10**, 4004–4008.
- 23 X. Ren, X. Ji, Y. Wei, D. Wu, Y. Zhang, M. Ma, Z. Liu, A. M. Asiri, Q. Wei and X. Sun, *Chem. Commun.*, 2018, **54**, 1425–1428.
- 24 X. Zhu, X. Shi, A. M. Asiri, Y. Luo and X. Sun, *Inorg. Chem. Front.*, 2018, **5**, 1188–1192.
- 25 R. Zhang, Z. Wang, S. Hao, R. Ge, X. Ren, F. Qu, G. Du, A. M. Asiri, B. Zheng and X. Sun, *ACS Sustainable Chem. Eng.*, 2017, **5**, 8518–8522.
- 26 C. Tang, N. Cheng, Z. Pu, W. Xing and X. Sun, *Angew. Chem., Int. Ed.*, 2015, **54**, 9351–9355.
- 27 N. Yang, C. Tang, K. Wang, G. Du, A. M. Asiri and X. Sun, *Nano Res.*, 2016, **9**, 3346–3354.
- 28 N. Cheng, Q. Liu, A. M. Asiri, W. Xing and X. Sun, *J. Mater. Chem. A*, 2015, **3**, 23207–23212.
- 29 Q. Liu, L. Xie, Z. Liu, G. Du, A.M. Asiri and X. Sun, *Chem. Commun.*, 2017, **53**, 12446–12449.

- 30 M. Gong, Y. Li, H. Wang, Y. Liang, J.Z. Wu, J. Zhou, J. Wang, T. Regier, F. Wei and H. Dai, *J. Am. Chem. Soc.*, 2013, **135**, 8452–8455.
- 31 L. Zhang, R. Zhang, R. Ge, X. Ren, S. Hao, F. Xie, F. Qu, Z. Liu, G. Du, A. M. Asiri, B. Zheng and X. Sun, *Chem. Eur. J.*, 2017, **23**, 11499–11503.
- 32 C. Tang, A. M. Asiri and X. Sun, *Chem. Commun.*, 2016, **52**, 4529–4532.
- 33 Q. Luo, M. Peng, X. Sun, Y. Luo and A. M. Asiri, *Int. J. Hydrogen Energy*, 2016, **41**, 8785–8792.
- 34 Y. Liu, H. Wang, D. Lin, C. Liu, P. Hsu, W. Liu, W. Chen and Y. Cui, *Energy Environ. Sci.*, 2015, **8**, 1719–1724.
- 35 J. Liu, J. Wang, B. Zhang, Y. Ruan, L. Lv, X. Ji, K. Xu, L. Miao and J. Jiang, *ACS Appl. Mater. Interfaces*, 2017, **9**, 15364–15372.
- 36 T. Liu, A. M. Asiri and X. Sun, *Nanoscale*, 2016, **8**, 3911–3915.
- 37 K. Fan, H. Chen, Y. Ji, H. Huang, P. M. Claesson, Q. Daniel, B. Philippe, H. Rensmo, F. Li, Y. Luo and L. Sun, *Nature Commun.*, 2016, **7**, 11981.
- 38 J. Zhao, X. Li, G. Cui and X. Sun, *Chem. Commun.*, 2018, **54**, 5462–5465.
- 39 J. Zhao, X. Ren, Q. Han, D. Fan, X. Sun, X. Kuang, Q. Wei and D. Wu, *Chem. Commun.*, 2018, **54**, 4987–4990.
- 40 D. Liu, Q. Lu, Y. Luo, X. Sun and A. M. Asiri, *Nanoscale*, 2015, **7**, 15122–15126.
- 41 Y. Li, H. Zhang, M. Jiang, Y. Kuang, X. Sun and X. Duan, *Nano Res.*, 2016, **9**, 2251–2259.
- 42 W. Fang, D. Liu, Q. Lu, X. Sun and A. M. Asiri, *Electrochem. Commun.*, 2016, **63**, 60–64.
- 43 T. Liu, X. Sun, A. M. Asiri and Y. He, *Int. J. Hydrogen Energy*, 2016, **41**, 7264–7269.
- 44 T. Ma, J. Cao, M. Jaroniec and S. Qiao, *Angew. Chem., Int. Ed.*, 2016, **55**, 1138–1142.
- 45 Q. Gao, C. Huang, Y. Ju, M. Gao, J. Liu, D. An, C. Cui, Y. Zheng, W. Li and S. Yu, *Angew. Chem., Int. Ed.*, 2017, **56**, 7769–7773.
- 46 X. Zhang, C. Si, X. Guo, R. Kong and F. Qu, *J. Mater. Chem. A*, 2017, **5**, 17211–17215.

- 47 R. Zhang, C. Tang, R. Kong, G. Du, A. M. Asiri, L. Chen and X. Sun, *Nanoscale*, 2017, **9**, 4793–4800.
- 48 K. Fan, Y. Ji, H. Zou, J. Zhang, B. Zhu, H. Chen, Q. Daniel, Y. Luo, J. Yu and L. Sun, *Angew. Chem., Int. Ed.*, 2017, **56**, 3289–3293.
- 49 A. Mendoza–Garcia, H. Zhu, Y. Yu, Q. Li, L. Zhou, D. Su, M. J. Kramer and S. Sun, *Angew. Chem., Int. Ed.*, 2015, **54**, 9642–9645.
- 50 J. Feng, S. Ye, H. Xu, Y. Tong and G. Li, *Adv. Mater.*, 2016, **28**, 4698–4703.
- 51 W. Lu, T. Liu, L. Xie, C. Tang, D. Liu, S. Hao, F. Qu, G. Du, Y. Ma, A. M. Asiri and X. Sun, *Small*, 2017, **13**, 1700805.
- 52 C. Tang, R. Zhang, W. Lu, L. He, X. Jiang, A. M. Asiri and X. Sun, *Adv. Mater.*, 2017, **29**, 1602441.
- 53 Z. Wang, H. Liu, R. Ge, X. Ren, J. Ren, D. Yang, L. Zhang and X. Sun, *ACS Catal.*, 2018, **8**, 2236–2241.
- 54 L. Zhang, T. Mi, M.A. Ziaee, L. Liang and R. Wang, *J. Mater. Chem. A*, 2018, **6**, 1639–1647.
- 55 H. Li, P. Wen, Q. Li, C. Dun, J. Xing, C. Lu, S. Adhikari, L. Jiang, D. L. Carroll and S. M. Geyer, *Adv. Energy Mater.*, 2017, **7**, 1700513.
- 56 C. Hu, L. Zhang, Z. Zhao, J. Luo, J. Shi, Z. Huang and J. Gong, *Adv. Mater.*, 2017, **29**, 1701820.
- 57 X. Lu, L. Gu, J. Wang, J. Wu, P. Liao and G. Li, *Adv. Mater.*, 2017, **29**, 1604437.
- 58 L. Yang, L. Xie, X. Ren, Z. Wang, Z. Liu, G. Du, A. M. Asiri, Y. Yao and X. Sun, *Chem. Commun.*, 2018, **54**, 78–81.
- 59 L. Yang, Y. Yao, G. Zhu, M. Ma, W. Wang, L. Wang, H. Zhang, Y. Zhang and Z. Jiao, *J. Alloy. Compd.*, 2018, **762**, 637–642.
- 60 A. Han, H. Zhang, R. Yuan, H. Ji and P. Du, *ACS Appl. Mater. Interfaces*, 2017, **9**, 2240–2248.
